# Supplementary material
Source: HighWire-hosted journal article supplement (https://jitc.bmj.com/content/7/1/32)
Supplement: media-1 [file media-1.pdf]

## Additional file 1: Supplementary methods and tables

**Supplementary Table 1. Multiplex Immunohistochemistry details for CXCR2/CD3/Arg1 and CD66b/CD3/Arg1 stainings**

| Staining sequence                    | 1                                                     | 2                                                            | 3                                                              |
|--------------------------------------|-------------------------------------------------------|--------------------------------------------------------------|----------------------------------------------------------------|
| Antibody (clone)                     | <b>Arginase 1 (D4E3M)</b>                             | <b>CD66b (80H3)</b>                                          | <b>CD3 (LN10)</b>                                              |
| Host, Clonality<br>M=monocl,P=polycl | Rabbit M IgG                                          | Mouse M IgG1                                                 | Mouse M IgG2a                                                  |
| Vendor (Catalog #)                   | Cell Signaling (#93668)                               | LifeSpan BioSciences (#LS-B7134)                             | Leica (#PA0553)                                                |
| Leica Antigen Retrieval (min)        | Bond-epitope retrieval solution 1, pH6.0 #AR9661 (30) | Bond-epitope retrieval solution 1, pH6.0 #AR9661 (20)        | Bond-epitope retrieval solution 2, p9.0 #AR9640 (20)           |
| Peroxidase Block                     | 10                                                    | 10                                                           | 10                                                             |
| Protein Block (min)<br>DAKO # X0909  | 10                                                    |                                                              |                                                                |
| 1°Ab Dilution (1:xx)                 | 100                                                   | 100                                                          | RTU                                                            |
| 1° Ab Inc. time                      | 2h                                                    | 3h                                                           | 2h                                                             |
| 2° Antibody                          | Novocastra Novolink Polymer #RE7200-K (Leica)         | Novocastra Novolink Post Primary & Polymer #RE7200-K (Leica) | Novocastra Novolink Post Primary & Polymer #RE7200-K (Leica)   |
| TSA Reagent                          | TSA-Cy5 #SAT705A001EA5                                | TSA-Cy3 #SAT704A001EA, Perkin Elmer                          | Alexa Fluor™ 488 Tyramide Reagent, # B40953, Life Technologies |
| Pseudo-color                         | Red                                                   | Cyan                                                         | Green                                                          |
| Detection Kit (Leica)                | Bond Research Detection Kit #DS9455                   | Bond Research Detection Kit #DS9455                          | Bond Research Detection Kit #DS9455                            |

**Supplementary Table 1. continued**

| Staining sequence                    | 1                                                     | 2                                                            | 3                                                              |
|--------------------------------------|-------------------------------------------------------|--------------------------------------------------------------|----------------------------------------------------------------|
| Antibody (clone)                     | <b>Arginase 1 (D4E3M)</b>                             | <b>CXCR2 (48311)</b>                                         | <b>CD3 (LN10)</b>                                              |
| Host, Clonality<br>M=monocl,P=polycl | Rabbit M IgG                                          | Mouse M IgG2A                                                | Mouse M IgG2a                                                  |
| Vendor (Catalog #)                   | Cell Signaling (#93668)                               | R&D Systems (#MAB331)                                        | Leica (#PA0553)                                                |
| Leica Antigen Retrieval (min)        | Bond-epitope retrieval solution 1, pH6.0 #AR9661 (30) | Bond-epitope retrieval solution 1, pH6.0 #AR9661 (20)        | Bond-epitope retrieval solution 2, pH9.0 #AR9640 (20)          |
| Peroxidase Block                     | 10                                                    | 10                                                           | 10                                                             |
| Protein Block (min)<br>DAKO # X0909  | 10                                                    |                                                              |                                                                |
| 1°Ab Dilution (1:xx)                 | 100                                                   | 50                                                           | RTU                                                            |
| 1° Ab Inc. time                      | 2h                                                    | 3h                                                           | 2h                                                             |
| 2° Antibody                          | Novocastra Novolink Polymer #RE7200-K (Leica)         | Novocastra Novolink Post Primary & Polymer #RE7200-K (Leica) | Novocastra Novolink Post Primary & Polymer #RE7200-K (Leica)   |
| TSA Reagent                          | TSA-Cy5 #SAT705A001EA5                                | TSA-Cy3 #SAT704A001EA, Perkin Elmer                          | Alexa Fluor™ 488 Tyramide Reagent, # B40953, Life Technologies |
| Pseudo-color                         | Red                                                   | Cyan                                                         | Green                                                          |
| Detection Kit (Leica)                | Bond Research Detection Kit #DS9455                   | Bond Research Detection Kit #DS9455                          | Bond Research Detection Kit #DS9455                            |

**Supplementary Table 2. Flow antibody list:**

| <b>Antigen</b> | <b>Clone</b> | <b>Antigen</b> | <b>Clone</b> |
|----------------|--------------|----------------|--------------|
| <b>CD45</b>    | 30-F11       | CD44           | IM7          |
| <b>CD3ε</b>    | 145-2C11     | PD-1           | 29F.1A12     |
| <b>CD4</b>     | RM4-5        | TIM-3          | RMT3-23      |
| <b>CD8a</b>    | 53-6.7       | LAG-3          | C9B7W        |
| <b>CD19</b>    | 6D5          | BTLA           | 8F4          |
| <b>DX5</b>     | DX5          | VISTA          | MH5A         |
| <b>NKp46</b>   | 29A1.4       | PD-L1          | 10F.9G2      |
| <b>CD11c</b>   | N418         | CEACAM1        | CC1          |
| <b>CD11b</b>   | M1/70        | FOXP3          | FJK-16s      |
| <b>Ly6G</b>    | 1A8          | CTLA-4         | UC10-4B9     |
| <b>IL-2</b>    | JES6-5H4     | Granzyme B     | QA16A02      |
| <b>CD103</b>   | 2E7          | IFNγ           | XMG1.2       |

**Supplementary Table 3: Summary of TMA Patient demographics:**

|                               | <b>Adeno</b> | <b>Squamous</b> |
|-------------------------------|--------------|-----------------|
| <b>Age at surgery</b>         |              |                 |
| <b>Median</b>                 | 64           | 66              |
| <b>Range</b>                  | 41-90        | 41-88           |
| <b>Unknown</b>                | 10           | 0               |
|                               |              |                 |
| <b>Gender</b>                 |              |                 |
| <b>Female</b>                 | 78 (52 %)    | 38 (37 %)       |
| <b>male</b>                   | 62 (41 %)    | 65 (63 %)       |
| <b>Unknown</b>                | 10 (7 %)     | 0               |
|                               |              |                 |
| <b>Smoking status</b>         |              |                 |
| <b>Never smoker</b>           | 26 (17 %)    |                 |
| <b>Past or current smoker</b> | 110 (73 %)   | 91 (88 %)       |
| <b>Unknown</b>                | 14 (9 %)     | 12 (12 %)       |
|                               |              |                 |
| <b>Pathology stage</b>        |              |                 |
| <b>IA</b>                     | 43 (29 %)    | 25 (24 %)       |
| <b>IB</b>                     | 27 (18 %)    | 35 (34 %)       |
| <b>IIA</b>                    | 9 (6 %)      | 6 (6 %)         |
| <b>IIB</b>                    | 26 (17 %)    | 24 (23 %)       |
| <b>IIIA</b>                   | 17 (11 %)    | 11 (11 %)       |
| <b>IIIB</b>                   | 2 (1 %)      | 1 (1 %)         |
| <b>IV</b>                     | 7 (5 %)      | 1 (1 %)         |
| <b>Unknown</b>                | 19 (13 %)    | 0               |

## **SUPPLEMENTARY METHODS:**

### **Analysis of single cell RNA sequencing data from lung cancer patients:**

Supplementary expression data from Lambrechts et al was retrieved (1) and Log10 normalized (FPKM) values were plotted.

### **Mouse tumor Immune profiling:**

Processing of lung tissue, staining, and flow cytometry analysis were performed as previously described (2). Mice were euthanatized and lungs were perfused with 5mM EDTA. Lung lobes were minced and incubated in dissociation buffer (100 units/ml of collagenase type IV) (Invitrogen), 10 µg/ml of DNase I (Roche), and 10% FBS in RPMI1640 medium for 45 minutes at 37 degrees. After tissue dissociation, red blood cells (RBC) were lysed with RBC lysis buffer (Gibco-10492), and cell suspensions were filtered through 70 micron cell strainer. Single cell suspension was centrifuged, and the cell pellet was dissolved in 2% FCS in HBSS, stained with Live/dead stain (Life Technologies, #L34959) and then with antibodies at 1:50 dilution. For intracellular cytokine staining, cells from whole lungs were fractionated over Ficoll-Paque (GE Healthcare) per the manufacturer's instructions. Isolated mononuclear cells were stimulated with 50 ng/ml PMA (Sigma) and 500 ng/ml Ionomycin (Sigma) for 6 hours in the presence of Golgi plug (BD Biosciences). Fixation/permeabilization buffer (eBioscience) were used for intracellular staining. Flow data acquisition was performed on a BD Canto II flow cytometer.

## **REFERENCES:**

1. Lambrechts D, Wauters E, Boeckx B, Aibar S, Nittner D, Burton O, et al. Phenotype molding of stromal cells in the lung tumor microenvironment. *Nat Med.* 2018;24(8):1277-89.
2. Akbay EA, Koyama S, Carretero J, Altabef A, Tchaicha JH, Christensen CL, et al. Activation of the PD-1 pathway contributes to immune escape in EGFR-driven lung tumors. *Cancer Discov.* 2013;3(12):1355-63.
